# Supplementary material
Source: HighWire-hosted journal article supplement (https://erj.ersjournals.com/content/58/1/2004318)
Supplement: inline-supplementary-material-1 [file inline-supplementary-material-1.pdf]

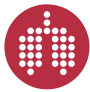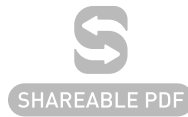

# Long-term variability of oscillatory impedance in stable obstructive airways disease

Sandra Rutting <sup>1,2</sup>, Tanya Badal<sup>1,3</sup>, Ryan Wallis<sup>2</sup>, Robin E. Schoeffel<sup>2</sup>, Nicole Roche<sup>1,2</sup>, Alice M. Cottee <sup>1,3,4</sup>, David G. Chapman <sup>1,5</sup>, Matthew Greenwood<sup>4,6</sup>, Claude S. Farah <sup>1,3,4</sup>, Gregory G. King<sup>1,2,4</sup> and Cindy Thamrin <sup>1,4</sup>

<sup>1</sup>Airway Physiology and Imaging Group, and Woolcock Emphysema Centre, Woolcock Institute of Medical Research, The University of Sydney, Glebe, Australia. <sup>2</sup>Dept of Respiratory Medicine, Royal North Shore Hospital, St Leonards, Australia. <sup>3</sup>Dept of Respiratory Medicine, Concord Repatriation General Hospital, Concord, Australia. <sup>4</sup>Faculty of Medicine and Health, The University of Sydney, Glebe, Australia. <sup>5</sup>School of Life Sciences, Faculty of Science, University of Technology Sydney, Ultimo, Australia. <sup>6</sup>Dept of Haematology and Transfusion Services, Royal North Shore Hospital, St Leonards, Australia.

Sandra Rutting (Sandra.Rutting@sydney.edu.au)

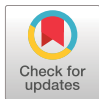

Shareable abstract (@ERSpublications)

FOT parameters have good long-term repeatability in patients with stable obstructive airways disease, facilitating its ability to detect sensitive changes in airways disease. Novel cut-off values presented may help determine clinically significant change. <https://bit.ly/3emL7FI>

**Cite this article as:** Rutting S, Badal T, Wallis R, *et al.* Long-term variability of oscillatory impedance in stable obstructive airways disease. *Eur Respir J* 2021; 58: 2004318 [DOI: 10.1183/13993003.04318-2020].

This single-page version can be shared freely online.

Copyright ©The authors 2021. For reproduction rights and permissions contact [permissions@ersnet.org](mailto:permissions@ersnet.org)

Received: 21 Sept 2020  
Accepted: 1 March 2021

*To the Editor:*

Respiratory oscillometry (or forced oscillation technique (FOT)), measures the mechanical properties of the respiratory system by superimposing oscillatory pressure waves at the mouth during quiet tidal breathing. Parameters include respiratory system resistance ( $R_{rs}$ ), a measure of airway calibre, and reactance ( $X_{rs}$ ), representing the elastic and inertive properties which are sensitive to airway closure [1]. FOT is increasingly being used for clinical monitoring of airways disease, which complements spirometric function [2].

Copyright ©The authors 2021. For reproduction rights and permissions contact [permissions@ersnet.org](mailto:permissions@ersnet.org)
